# Supplementary material
Source: publisher site journal article supplement (https://www.dovepress.com/get_supplementary_file.php?f=260891.docx)

**supplementary Figure 1：**Mediation model of the relationship between serum uric acid (SUA) and fasting C-peptide: body mass index (BMI), central obesity parameters as a medium. The path α represents the regression coefficient of the association between SUA and BMI, the central obesity parameter "action theory". Path β represents the regression coefficient of BMI, the association between central obesity parameters and the "conceptual theory" of fasting C-peptide. The product of the regression coefficients α and β represents the BMI, the central obesity parameter (α#β) mediated (indirect effect). After correcting BMI, central obesity parameters, γ' represents the direct effect of SUA and fasting C peptide. Path γ represents the simple total effect of SUA on fasting C-peptide, the “total effect” of the BMI, central obesity parameters.


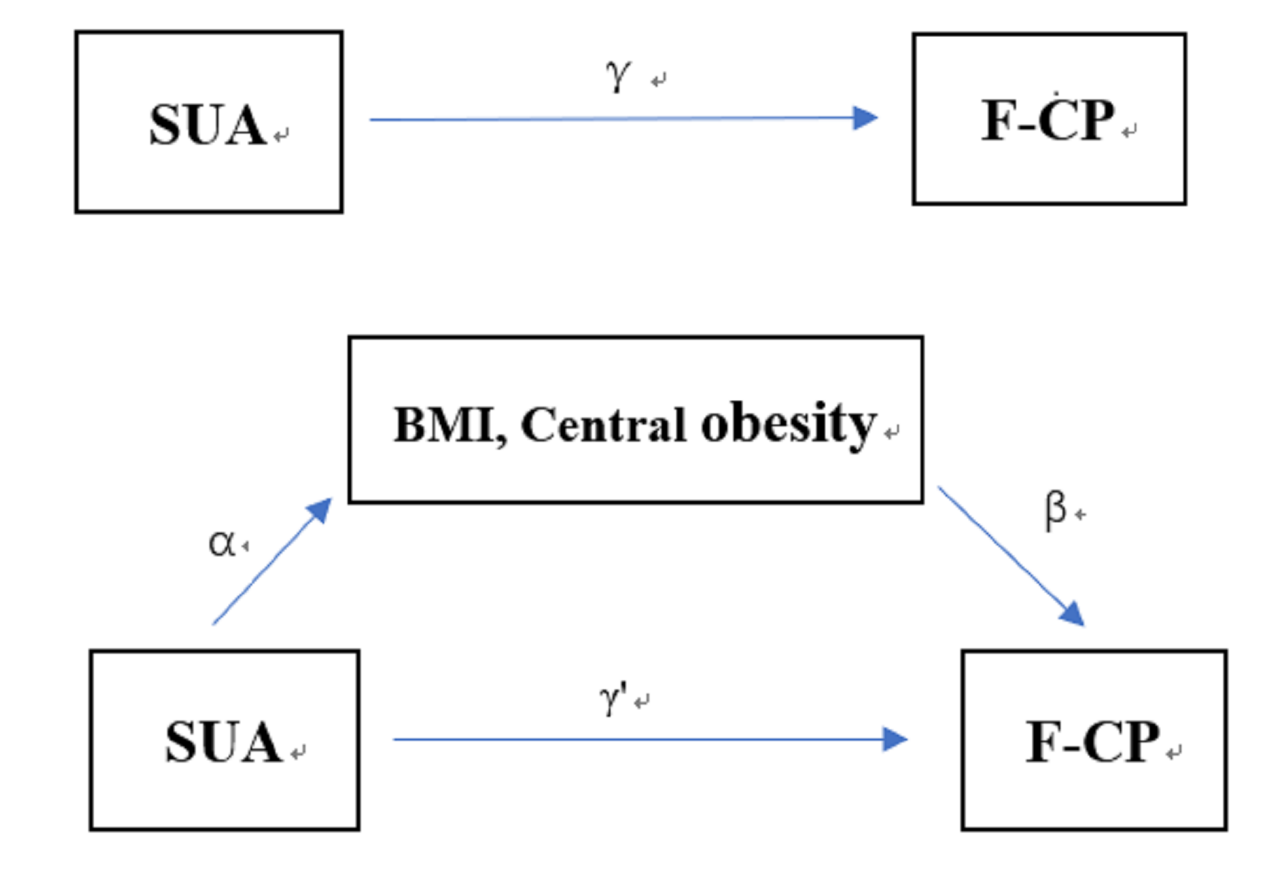

Supplement: Supplementary file 1 [file get_supplementary_file.php]
